# Supplementary material for: Genetic design of soybean hosts and bradyrhizobial endosymbionts reduces N2O emissions from soybean farming
Source: Research Square preprint supplement (doi:10.21203/rs.3.rs-5679948/v1), 2025-01-15
Supplement: Supplementary file 1 [file 2922e6202df96b5121440686.docx]

| **Supplementary Table 1**. Genotype analysis of the Rj2 and GmNNL1 genes in soybean | | | |  |  |
| --- | --- | --- | --- | --- | --- |
| Accession ID | Status | Accession Name | Origin | *Rj2* | *GmNNL1* |
|
| Bonminori | Breeders line | BONMINORI | Japan | *Rj2* | *Gmnnl1* |
| GmJMC002 | Landrace | WASE KURO DAIZU | Japan | *rj2* | *Gmnnl1* |
| GmJMC003 | Landrace | NATSU KURAKAKE | Japan | *rj2* | *Gmnnl1* |
| GmJMC004 | Landrace | KITAJIRO | Japan | *rj2* | *Gmnnl1* |
| GmJMC005 | Landrace | WASEOUSODE (SHIKAOI ITOH) | Japan | *rj2* | *Gmnnl1* |
| GmJMC007 | Breeders line | TOKACHI NAGAHA | Japan | *rj2* | *Gmnnl1* |
| GmJMC008 | Landrace | KANAGAWA WASE | Japan | *rj2* | *Gmnnl1* |
| GmJMC009 | Breeders line | SHIZUNAIDAIZU | Japan | *rj2* | *Gmnnl1* |
| GmJMC013 | Breeders line | CHIZUKA IBARAKI 1 | Japan | *Rj2* | *Gmnnl1* |
| GmJMC016 | Landrace | JUKKOKU | Japan | *rj2* | *Gmnnl1* |
| GmJMC017 | Breeders line | SAKYUU AO MAME | Japan | *rj2* | *Gmnnl1* |
| GmJMC021 | Breeders line | OOYACHI 2 | Japan | *rj2* | *Gmnnl1* |
| GmJMC023 | Landrace | KUROGOYOU | Japan | *rj2* | *Gmnnl1* |
| GmJMC025 | Breeders line | ENREI | Japan | *rj2* | *Gmnnl1* |
| GmJMC026 | Breeders line | ONI HADAKA | Japan | *rj2* | *Gmnnl1* |
| GmJMC028 | Landrace | KOITO | Japan | *rj2* | *Gmnnl1* |
| GmJMC030 | Landrace | KURODAIZU (AO HIGUU CHUU) | Japan | *rj2* | *Gmnnl1* |
| GmJMC031 | Landrace | SHIRO MITSU MAME | Japan | *rj2* | *Gmnnl1* |
| GmJMC032 | Breeders line | NATTOU KOTSUBU | Japan | *rj2* | *Gmnnl1* |
| GmJMC033 | Landrace | BANSEI HIKARIKURO | Japan | *rj2* | *Gmnnl1* |
| GmJMC034 | Breeders line | MIYAGISHIROME | Japan | *rj2* | *Gmnnl1* |
| GmJMC037 | Landrace | YAKUMO MEAKA | Japan | *rj2* | *Gmnnl1* |
| GmJMC039 | Landrace | NATTOUMAME | Japan | *rj2* | *Gmnnl1* |
| GmJMC040 | Landrace | KOIBUCHIMURA ZAIRAI | Japan | *rj2* | *Gmnnl1* |
| GmJMC041 | Landrace | DATE CHA MAME | Japan | *Rj2* | *Gmnnl1* |
| GmJMC043 | Landrace | TAKIYA | Japan | *rj2* | *Gmnnl1* |
| GmJMC044 | Landrace | SHAKKIN NASHI | Japan | *rj2* | *Gmnnl1* |
| GmJMC047 | Landrace | AKITA ANI | Japan | *rj2* | *Gmnnl1* |
| GmJMC049 | Landrace | HIKU ANDA | Japan | *rj2* | *Gmnnl1* |
| GmJMC050 | Landrace | FUKUI SHIRO | Japan | *rj2* | *Gmnnl1* |
| GmJMC051 | Landrace | KURODAIZU (GEIHOKU) | Japan | *rj2* | *Gmnnl1* |
| GmJMC052 | Landrace | KISAYA (NATSU) | Japan | *rj2* | *Gmnnl1* |
| GmJMC053 | Landrace | ABURA MAME | Japan | *rj2* | *Gmnnl1* |
| GmJMC054 | Landrace | ZAIRAI 51-6 | Japan | *rj2* | *Gmnnl1* |
| GmJMC055 | Landrace | SAKURAMAME | Japan | *rj2* | *Gmnnl1* |
| GmJMC056 | Breeders line | TAMAHOMARE | Japan | *rj2* | *Gmnnl1* |
| GmJMC057 | Landrace | SHAKUJOU DAIZU | Japan | *rj2* | *Gmnnl1* |
| GmJMC058 | Landrace | YAHAGI | Japan | *rj2* | *Gmnnl1* |
| GmJMC059 | Landrace | SOKOSHIN | Japan | *rj2* | *Gmnnl1* |
| GmJMC060 | Landrace | SHIMO HISAKATA DAIZU | Japan | *rj2* | *Gmnnl1* |
| GmJMC061 | Landrace | KOMAME | Japan | *rj2* | *Gmnnl1* |
| GmJMC062 | Landrace | AZEMAME | Japan | *rj2* | *Gmnnl1* |
| GmJMC063 | Landrace | AOBAKO | Japan | *Rj2* | *Gmnnl1* |
| GmJMC064 | Landrace | MEGURO 1 | Japan | *rj2* | *Gmnnl1* |
| GmJMC065 | Landrace | OOJIRO | Japan | *rj2* | *Gmnnl1* |
| GmJMC067 | Landrace | HOUJAKU | Japan | *rj2* | *Gmnnl1* |
| GmJMC068 | Landrace | ZAIRAI 51-2 | Japan | *rj2* | *Gmnnl1* |
| GmJMC069 | Landrace | CHADAIZU | Japan | *rj2* | *Gmnnl1* |
| GmJMC076 | Landrace | IHHON SANGOU | Japan | *rj2* | *Gmnnl1* |
| GmJMC077 | Landrace | HITORIMUSUME | Japan | *rj2* | *Gmnnl1* |
| GmJMC078 | Landrace | AKASAYA GmJMC078 | Japan | *rj2* | *Gmnnl1* |
| GmJMC079 | Landrace | KURUMIMAME | Japan | *rj2* | *Gmnnl1* |
| GmJMC080 | Landrace | HIME DAIZU | Japan | *rj2* | *Gmnnl1* |
| GmJMC081 | Landrace | AKUDEN SHIRAZU | Japan | *rj2* | *Gmnnl1* |
| GmJMC082 | Landrace | AOAKIMAME | Japan | *rj2* | *Gmnnl1* |
| GmJMC085 | Landrace | DAIZU GmJMC085 | Japan | *rj2* | *Gmnnl1* |
| GmJMC088 | Landrace | CHUU TEPPOU | Japan | *rj2* | *Gmnnl1* |
| GmJMC090 | Landrace | DADACHAMAME | Japan | *rj2* | *Gmnnl1* |
| GmJMC091 | Landrace | KUROTOME | Japan | *rj2* | *Gmnnl1* |
| GmJMC092 | Landrace | KUROHIRA | Japan | *rj2* | *Gmnnl1* |
| GmJMC093 | Landrace | ZAI 52-12 | Japan | *rj2* | *Gmnnl1* |
| GmJMC095 | Landrace | AKASAYA GmJMC095 | Japan | *rj2* | *Gmnnl1* |
| GmJMC096 | Landrace | NAKAHATA ZAIRAI | Japan | *rj2* | *Gmnnl1* |
| GmJMC097 | Landrace | IPPON SUZUNARI | Japan | *rj2* | *Gmnnl1* |
| GmJMC098 | Landrace | AKA DAIZU | Japan | *rj2* | *Gmnnl1* |
| GmJMC099 | Landrace | AMAGI ZAIRAI 90D | Japan | *rj2* | *Gmnnl1* |
| GmJMC100 | Landrace | KUROMAME | Japan | *rj2* | *Gmnnl1* |
| GmJMC101 | Landrace | COL/EHIME/1983/UTSUNOMIYA 22 | Japan | *rj2* | *Gmnnl1* |
| GmJMC102 | Landrace | KURAKAKE | Japan | *Rj2* | *Gmnnl1* |
| GmJMC104 | Landrace | DAIZU (SHIRO) | Japan | *Rj2* | *Gmnnl1* |
| GmJMC105 | Landrace | MAETSUE ZAIRAI 90B | Japan | *Rj2* | *Gmnnl1* |
| GmJMC106 | Breeders line | HIMESHIRAZU | Japan | *rj2* | *Gmnnl1* |
| GmJMC110 | Landrace | COL/TANBA/1989/ODAGAKI 2 | Japan | *rj2* | *Gmnnl1* |
| GmJMC111 | Landrace | AMAGI ZAIRAI 90A | Japan | *rj2* | *Gmnnl1* |
| GmJMC112 | Breeders line | FUKUYUTAKA | Japan | *rj2* | *Gmnnl1* |
| GmJMC114 | Landrace | COL/EHIME/1-2 | Japan | *rj2* | *Gmnnl1* |
| GmJMC116 | Landrace | SHIRATAMA | Japan | *rj2* | *Gmnnl1* |
| GmJMC117 | Breeders line | AKISENGOKU | Japan | *rj2* | *Gmnnl1* |
| GmJMC121 | Landrace | KOSA MAME | Japan | *rj2* | *Gmnnl1* |
| GmJMC126 | Landrace | KOKUBU 7 | Japan | *rj2* | *Gmnnl1* |
| GmJMC128 | Landrace | GIN DAIZU | China | *rj2* | *Gmnnl1* |
| GmJMC130 | Landrace | HITASHIMAME | Japan | *rj2* | *Gmnnl1* |
| GmJMC131 | Landrace | COL/EHIME/1983/UTSUNOMIYA 28 | Japan | *rj2* | *Gmnnl1* |
| GmJMC133 | Landrace | DAIZU GmJMC133 | Japan | *rj2* | *Gmnnl1* |
| GmJMC137 | Landrace | COL/EHIME/1983/UTSUNOMIYA 37 | Japan | *rj2* | *Gmnnl1* |
| GmJMC139 | Landrace | BUNSEI | Japan | *rj2* | *Gmnnl1* |
| GmJMC145 | Landrace | SHIMOTSURA | Japan | *rj2* | *Gmnnl1* |
| GmJMC149 | Landrace | MOCHI-DAIZU | Japan | *rj2* | *Gmnnl1* |
| GmJMC158 | Landrace | KUMAJI 1 | Japan | *Rj2* | *Gmnnl1* |
| GmJMC161 | Landrace | ITSUKI ZAIRAI 83H | Japan | *rj2* | *Gmnnl1* |
| GmJMC167 | Landrace | NANKAN ZAIRAI 83 | Japan | *rj2* | *Gmnnl1* |
| GmJMC172 | Breeders line | TSURUSENGOKU | Japan | *rj2* | *Gmnnl1* |
| GmJMC177 | Landrace | HAI MAME | Japan | *rj2* | *Gmnnl1* |
| GmJMC179 | Landrace | SAGA ZAIRAI | Japan | *rj2* | *Gmnnl1* |
| GmJMC180 | Landrace | KOMUTA | Japan | *rj2* | *Gmnnl1* |
| GmJMC184 | Landrace | BAN KURO DAIZU | Japan | *rj2* | *Gmnnl1* |
| GmWMC001 | Breeders line | FISKEBY V | Sweden | *rj2* | *Gmnnl1* |
| GmWMC006 | Landrace | KS 1034 | Malaysia | *rj2* | *Gmnnl1* |
| GmWMC010 | Landrace | DA BAI MEI | China | *rj2* | *Gmnnl1* |
| GmWMC011 | Landrace | SEITA | South Korea | *rj2* | *Gmnnl1* |
| GmWMC012 | Landrace | MANSHUU | China | *rj2* | *Gmnnl1* |
| GmWMC014 | Landrace | KLS 203 | South Korea | *rj2* | *Gmnnl1* |
| GmWMC015 | Landrace | CHUUHOKU 2 | South Korea | *rj2* | *Gmnnl1* |
| GmWMC018 | Landrace | RIGAI SEITOU | China | *rj2* | *Gmnnl1* |
| GmWMC019 | Landrace | CHOUSENSHU (CHA) | North Korea | *rj2* | *Gmnnl1* |
| GmWMC020 | Landrace | POCHAL | Taiwan | *rj2* | *Gmnnl1* |
| GmWMC022 | Landrace | NEZUMI META | North Korea | *rj2* | *Gmnnl1* |
| GmWMC024 | Landrace | CHIENEUM KONG | South Korea | *Rj2* | *Gmnnl1* |
| GmWMC027 | Landrace | KONGNAMUL KONG | South Korea | *Rj2* | *Gmnnl1* |
| GmWMC029 | Landrace | SHIROSOTA | North Korea | *rj2* | *Gmnnl1* |
| GmWMC035 | Landrace | PEKIN DAI OUTOU | China | *rj2* | *Gmnnl1* |
| GmWMC036 | Landrace | MOSHIDOU GONG 502 | China | *rj2* | *Gmnnl1* |
| GmWMC038 | Landrace | ICHIGUUHOU | China | *rj2* | *Gmnnl1* |
| GmWMC042 | Landrace | MOSHIDOU GONG 503 | China | *rj2* | *Gmnnl1* |
| GmWMC045 | Landrace | OKJO | South Korea | *rj2* | *Gmnnl1* |
| GmWMC046 | Landrace | KE 32 | Philippines | *rj2* | *Gmnnl1* |
| GmWMC048 | Landrace | HEAMNAM | South Korea | *rj2* | *Gmnnl1* |
| GmWMC066 | Landrace | HEUKDAELIP | South Korea | *rj2* | *Gmnnl1* |
| GmWMC070 | Landrace | CHOYOUTOU | China | *rj2* | *Gmnnl1* |
| GmWMC071 | Landrace | PK 73-54 | India | *rj2* | *Gmnnl1* |
| GmWMC072 | Landrace | M 581 | India | *rj2* | *Gmnnl1* |
| GmWMC073 | Landrace | URONKON | North Korea | *rj2* | *Gmnnl1* |
| GmWMC074 | Landrace | THET LAT (3 MONTH) | Myanmar | *rj2* | *Gmnnl1* |
| GmWMC075 | Landrace | CHEONGYE MYONGTAE | South Korea | *rj2* | *Gmnnl1* |
| GmWMC083 | Landrace | KEUMDU | South Korea | *rj2* | *Gmnnl1* |
| GmWMC084 | Landrace | PEKING | China | *rj2* | *Gmnnl1* |
| GmWMC086 | Landrace | ANTO SHOUKOKUTOU | China | *rj2* | *Gmnnl1* |
| GmWMC087 | Landrace | DAU TUONG XANH LO | Viet Nam | *rj2* | *Gmnnl1* |
| GmWMC089 | Landrace | BONGCHUNBAEKJAM | China | *rj2* | *Gmnnl1* |
| GmWMC094 | Landrace | JEOKGAK | South Korea | *rj2* | *Gmnnl1* |
| GmWMC103 | Landrace | SENYOUTOU | China | *rj2* | *Gmnnl1* |
| GmWMC107 | Landrace | HAKKA ZASHI | China | *rj2* | *Gmnnl1* |
| GmWMC108 | Landrace | KARASUMAME | China | *rj2* | *GmNNL1* |
| GmWMC109 | Landrace | TOPUTOPPU | Thailand | *rj2* | *Gmnnl1* |
| GmWMC113 | Landrace | BARITOU 3 A | Indonesia | *rj2* | *Gmnnl1* |
| GmWMC115 | Breeders line | Williams82 | USA | *rj2* | *Gmnnl1* |
| GmWMC118 | Landrace | OUDU | South Korea | *rj2* | *Gmnnl1* |
| GmWMC119 | Landrace | HAKUBI | China | *rj2* | *Gmnnl1* |
| GmWMC120 | Landrace | U 1416 | Nepal | *rj2* | *Gmnnl1* |
| GmWMC122 | Landrace | GAPSANJAELAE (I) | South Korea | *rj2* | *Gmnnl1* |
| GmWMC123 | Landrace | N 2295 | Nepal | *rj2* | *Gmnnl1* |
| GmWMC124 | Landrace | GU TIAN DOW | China | *rj2* | *Gmnnl1* |
| GmWMC125 | Landrace | BHATMAS | Nepal | *rj2* | *Gmnnl1* |
| GmWMC127 | Landrace | GREEN PE POKE | Myanmar | *rj2* | *Gmnnl1* |
| GmWMC129 | Landrace | AOKI MAME | China | *rj2* | *Gmnnl1* |
| GmWMC132 | Landrace | L 2A | Philippines | *rj2* | *Gmnnl1* |
| GmWMC134 | Landrace | PI 549018 (ZYD3939) | China | *rj2* | *GmNNL1* |
| GmWMC135 | Landrace | DAU TUONG.QUOC PHONG | Viet Nam | *rj2* | *Gmnnl1* |
| GmWMC136 | Landrace | LOCAL VAR (SEPUTIH RAMAN) | Indonesia | *rj2* | *Gmnnl1* |
| GmWMC138 | Landrace | COL/PAK/1989/IBPGR/2326(1) | Pakistan | *rj2* | *Gmnnl1* |
| GmWMC140 | Landrace | COL/LAOS/2005/NIAS/CED2005L25 | Laos | *rj2* | *Gmnnl1* |
| GmWMC141 | Landrace | PETEK | Indonesia | *rj2* | *Gmnnl1* |
| GmWMC142 | Landrace | JAVA 5 | Indonesia | *rj2* | *Gmnnl1* |
| GmWMC143 | Landrace | M 44 | India | *rj2* | *Gmnnl1* |
| GmWMC144 | Landrace | M 918 | India | *rj2* | *Gmnnl1* |
| GmWMC146 | Landrace | HM 39 | India | *rj2* | *Gmnnl1* |
| GmWMC147 | Landrace | COL/THAI/1986/THAI-78 | Thailand | *rj2* | *Gmnnl1* |
| GmWMC148 | Landrace | M 42 | India | *rj2* | *Gmnnl1* |
| GmWMC150 | Landrace | U 1042-1 | Nepal | *rj2* | *Gmnnl1* |
| GmWMC151 | Landrace | JAVA 7 | Indonesia | *rj2* | *Gmnnl1* |
| GmWMC152 | Landrace | U 1290-1 | Nepal | *rj2* | *Gmnnl1* |
| GmWMC153 | Landrace | DAU NANH | Viet Nam | *rj2* | *Gmnnl1* |
| GmWMC154 | Landrace | MANSHUU MASSHOKUTOU | China | *rj2* | *Gmnnl1* |
| GmWMC155 | Landrace | PE POKE (AHEY) | Myanmar | *rj2* | *Gmnnl1* |
| GmWMC156 | Landrace | U 8006-3 | Nepal | *rj2* | *Gmnnl1* |
| GmWMC157 | Landrace | COL/MYANMAR/2006/U_TSUKUBA/073 | Myanmar | *rj2* | *Gmnnl1* |
| GmWMC159 | Landrace | COL/PAK/1989/IBPGR/2323(2) | Pakistan | *rj2* | *Gmnnl1* |
| GmWMC160 | Landrace | N 2392 | Nepal | *rj2* | *Gmnnl1* |
| GmWMC162 | Landrace | COL/THAI/1986/THAI-80 | Thailand | *rj2* | *Gmnnl1* |
| GmWMC163 | Landrace | N 2491 | Nepal | *rj2* | *Gmnnl1* |
| GmWMC164 | Landrace | SHAO TONG QI YUE HUANG | China | *rj2* | *Gmnnl1* |
| GmWMC165 | Landrace | KARASUMAME (SHINCHIKU) | Taiwan | *rj2* | *GmNNL1* |
| GmWMC166 | Breeders line | MERAPI | Indonesia | *rj2* | *Gmnnl1* |
| GmWMC168 | Landrace | L 317 | India | *rj2* | *Gmnnl1* |
| GmWMC169 | Landrace | HAKUCHIKOU | China | *rj2* | *Gmnnl1* |
| GmWMC170 | Landrace | M 652 | India | *rj2* | *Gmnnl1* |
| GmWMC171 | Landrace | U-1741-2-2 NO.3 | Nepal | *rj2* | *Gmnnl1* |
| GmWMC173 | Landrace | KARASUMAME(NAIHOU) | Taiwan | *rj2* | *Gmnnl1* |
| GmWMC174 | Landrace | COL/EAST TIMOR/2005/NIAS/CED2005ET-19 | East Timor | *rj2* | *Gmnnl1* |
| GmWMC175 | Landrace | BISHUU DAIZU | China | *rj2* | *Gmnnl1* |
| GmWMC176 | Landrace | SANDEK SIENG | Cambodia | *rj2* | *Gmnnl1* |
| GmWMC178 | Landrace | BAO SHAN LU PI DAU | China | *rj2* | *Gmnnl1* |
| GmWMC181 | Landrace | CHIENGMAI PALMETTO | Thailand | *rj2* | *Gmnnl1* |
| GmWMC182 | Landrace | LOCAL VAR (TEGINENENG) | Indonesia | *rj2* | *Gmnnl1* |
| GmWMC183 | Landrace | KARASUMAME (HEITOU) | Taiwan | *rj2* | *Gmnnl1* |
| GmWMC185 | Landrace | JI AN HUANG DOW | China | *rj2* | *Gmnnl1* |
| GmWMC186 | Breeders line | RINGGIT | Indonesia | *rj2* | *Gmnnl1* |
| GmWMC187 | Landrace | KADI BHATTO | Nepal | *rj2* | *Gmnnl1* |
| GmWMC188 | Landrace | E C 112828 | India | *rj2* | *Gmnnl1* |
| GmWMC189 | Landrace | COL/EAST TIMOR/2005/NIAS/CED2005ET-37-2 | East Timor | *rj2* | *GmNNL1* |
| GmWMC190 | Landrace | SAN SAI | Thailand | *rj2* | *Gmnnl1* |
| GmWMC191 | Landrace | MISS 33 DIXI | Philippines | *rj2* | *Gmnnl1* |
| GmWMC192 | Landrace | U 1155-4 | Nepal | *rj2* | *Gmnnl1* |

| **Supplemental Table 3.** Primer information for the indel markers used in the genotype analysis of the Rj2 and GmNNL1 genes. | | |
| --- | --- | --- |
| Marker ID | Primer-1 | Primer-2 |
| Rj2_indel | GCTATGGCGAAGGGTGTTAG | TCACGAGTTGTTGGTGTGGT |
| GmNNL1_indel | TTCTCTGCCTGTGTCTCGAA | GGAGAAAGTCGTTGGTTTGG |
