# Supplementary material for: Genetic design of soybean hosts and bradyrhizobial endosymbionts reduces N2O emissions from soybean farming
Source: Research Square preprint supplement (doi:10.21203/rs.3.rs-5679948/v1), 2025-01-15
Supplement: Supplementary file 2 [file 5c065c3945d1f71e353c4472.docx]

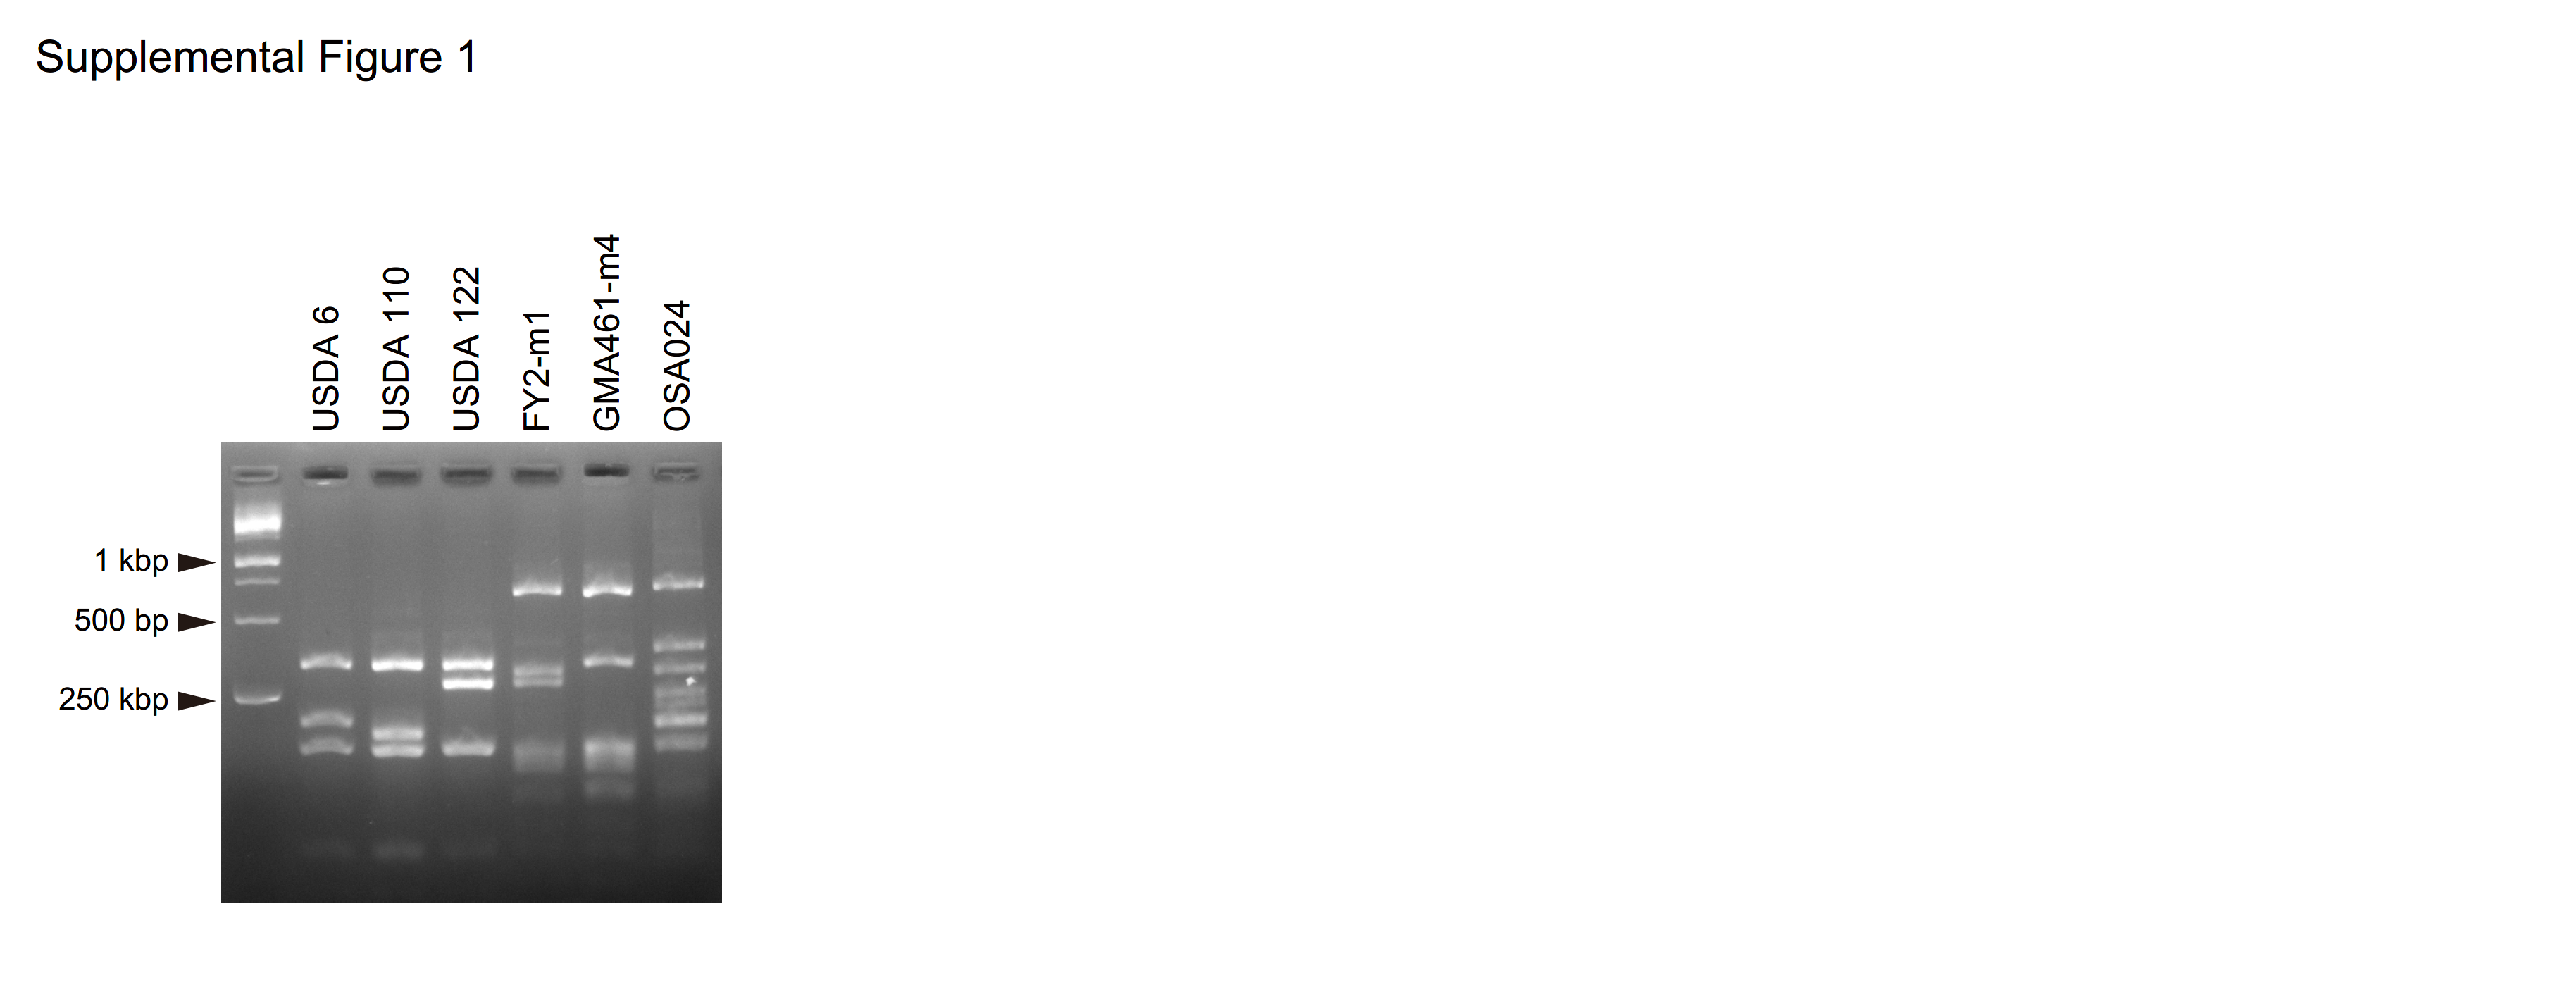


**Supplemental Figure 1**. PCR-RFLP analysis of the *nopP* regions in the bradyrhizobia strains inoculated.


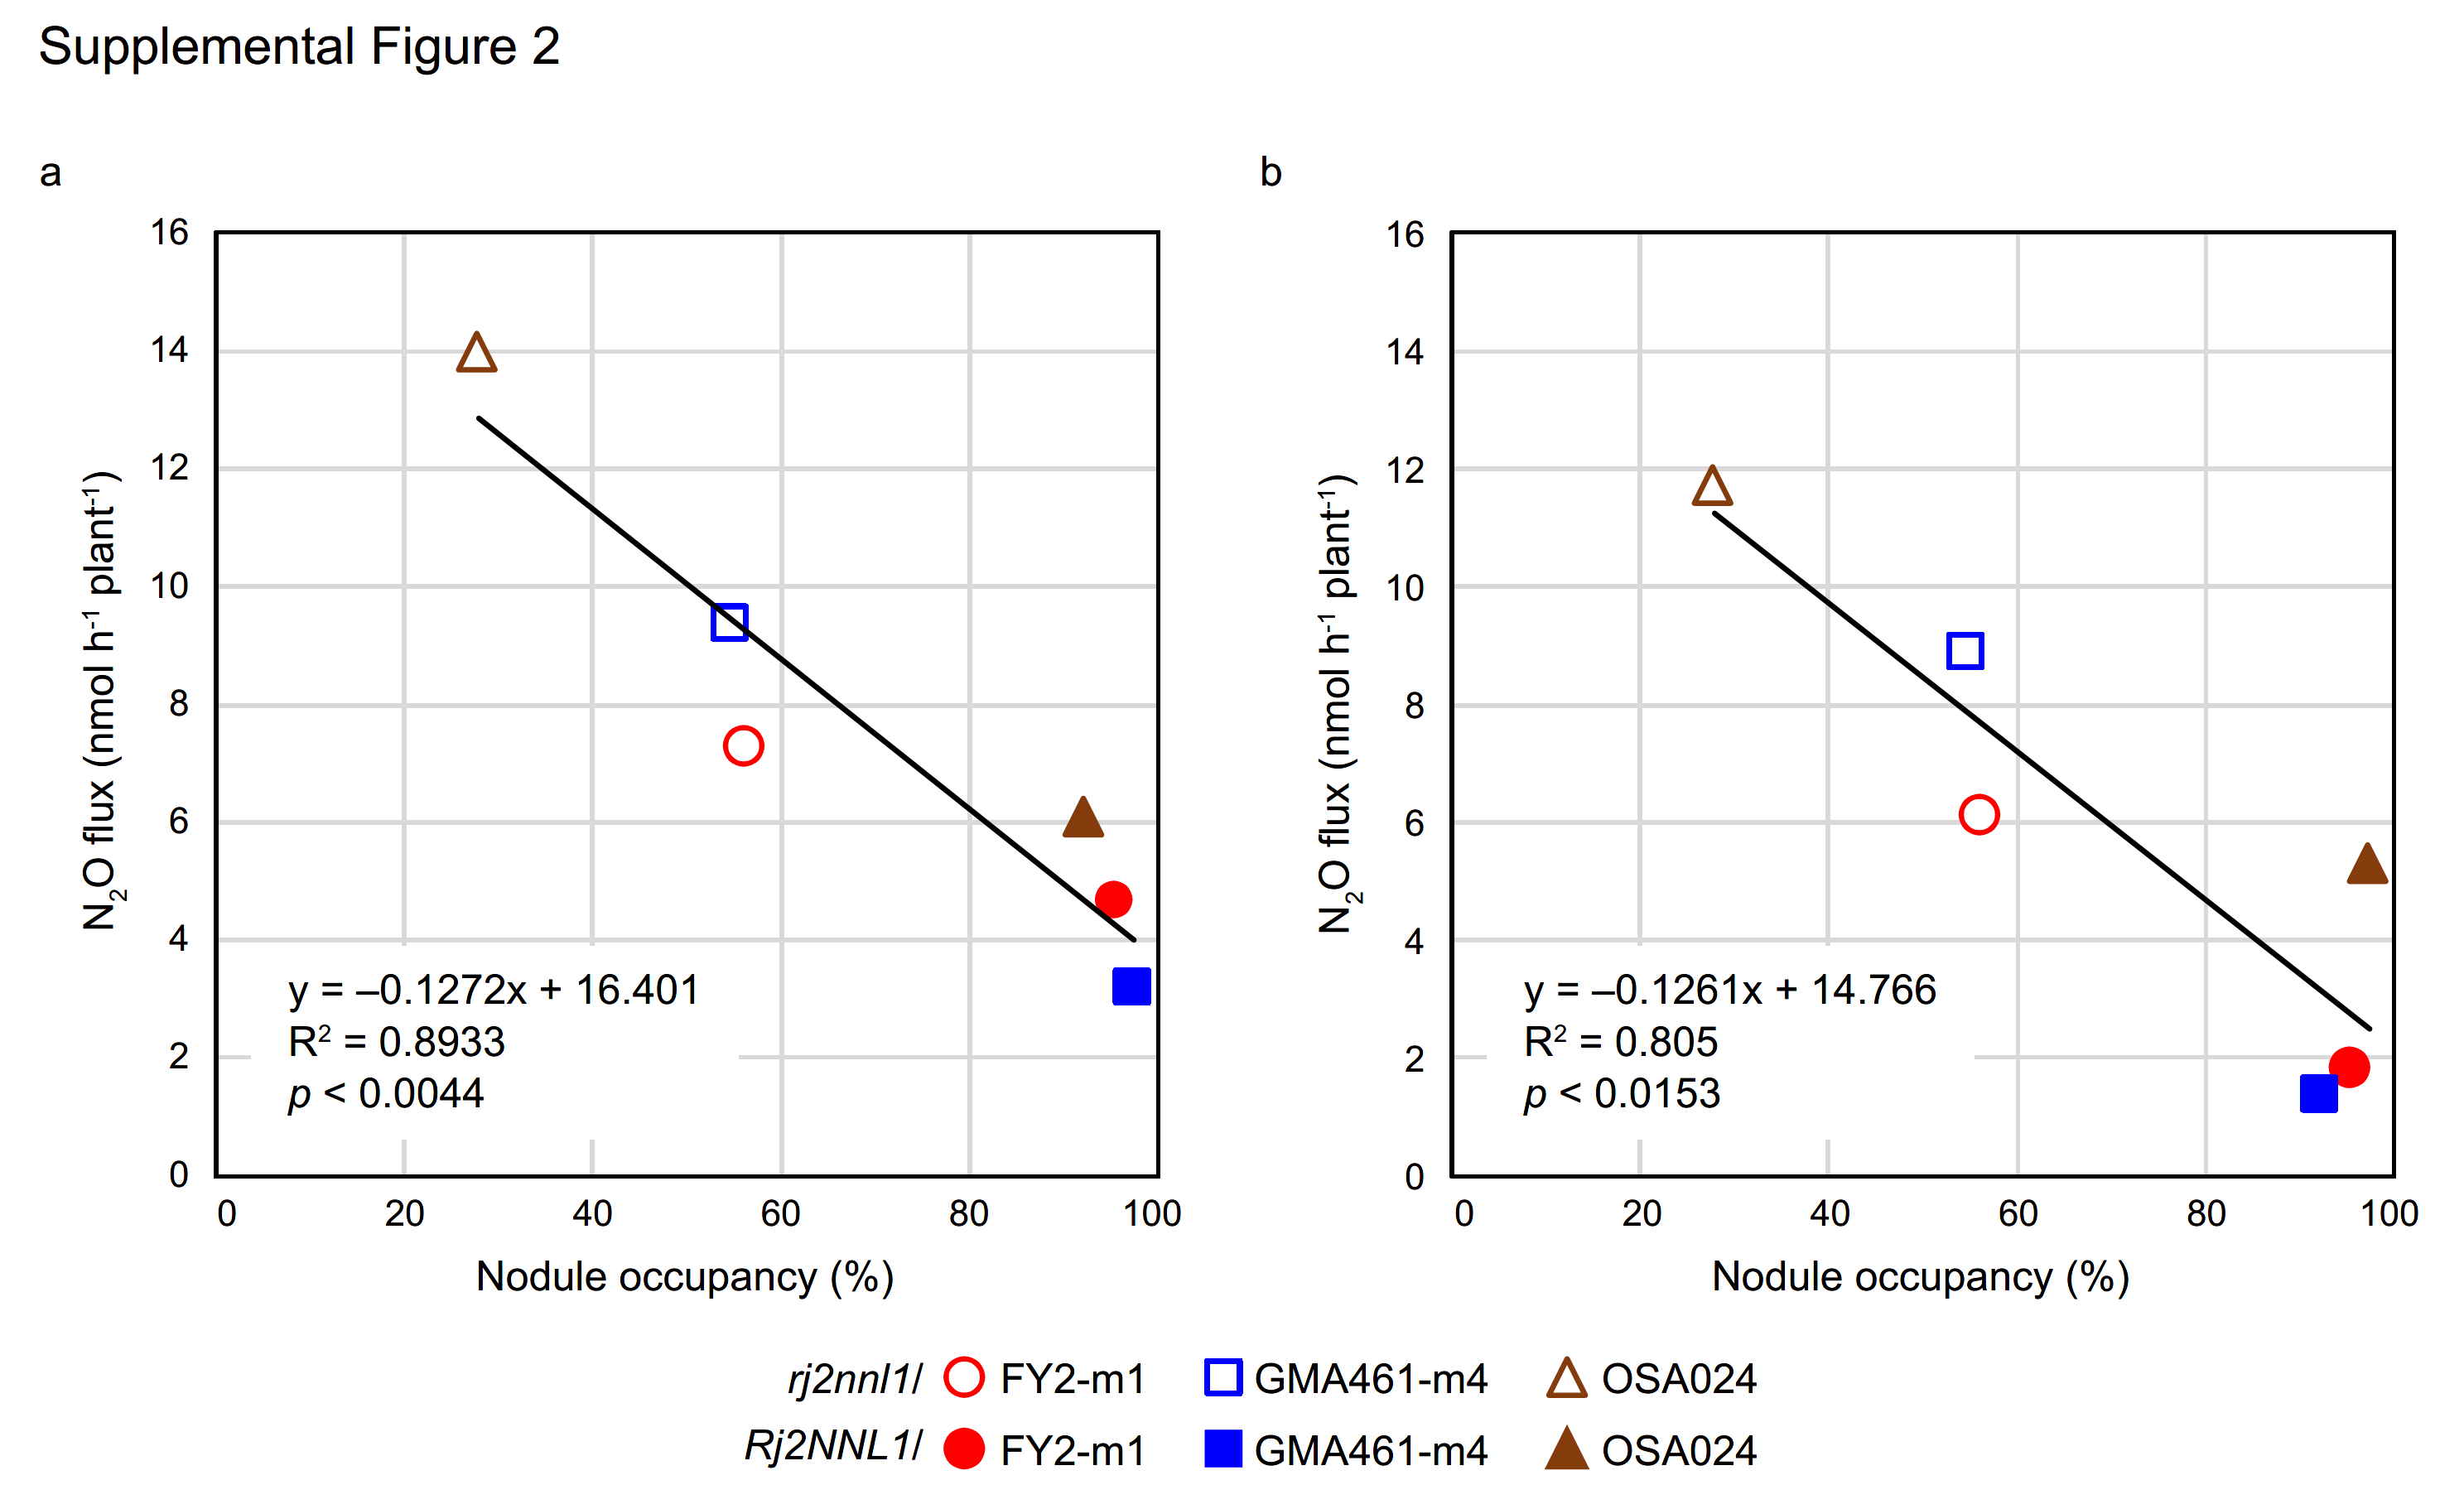


**Supplemental Figure 2**. Relationship between nodule occupancy of incompatibility-avoiding N2O-reducing bradyrhizobia strains and N2O flux.

a. Two weeks after decapitation. b. Three weeks after decapitation. Lines and equations represent linear regression results.


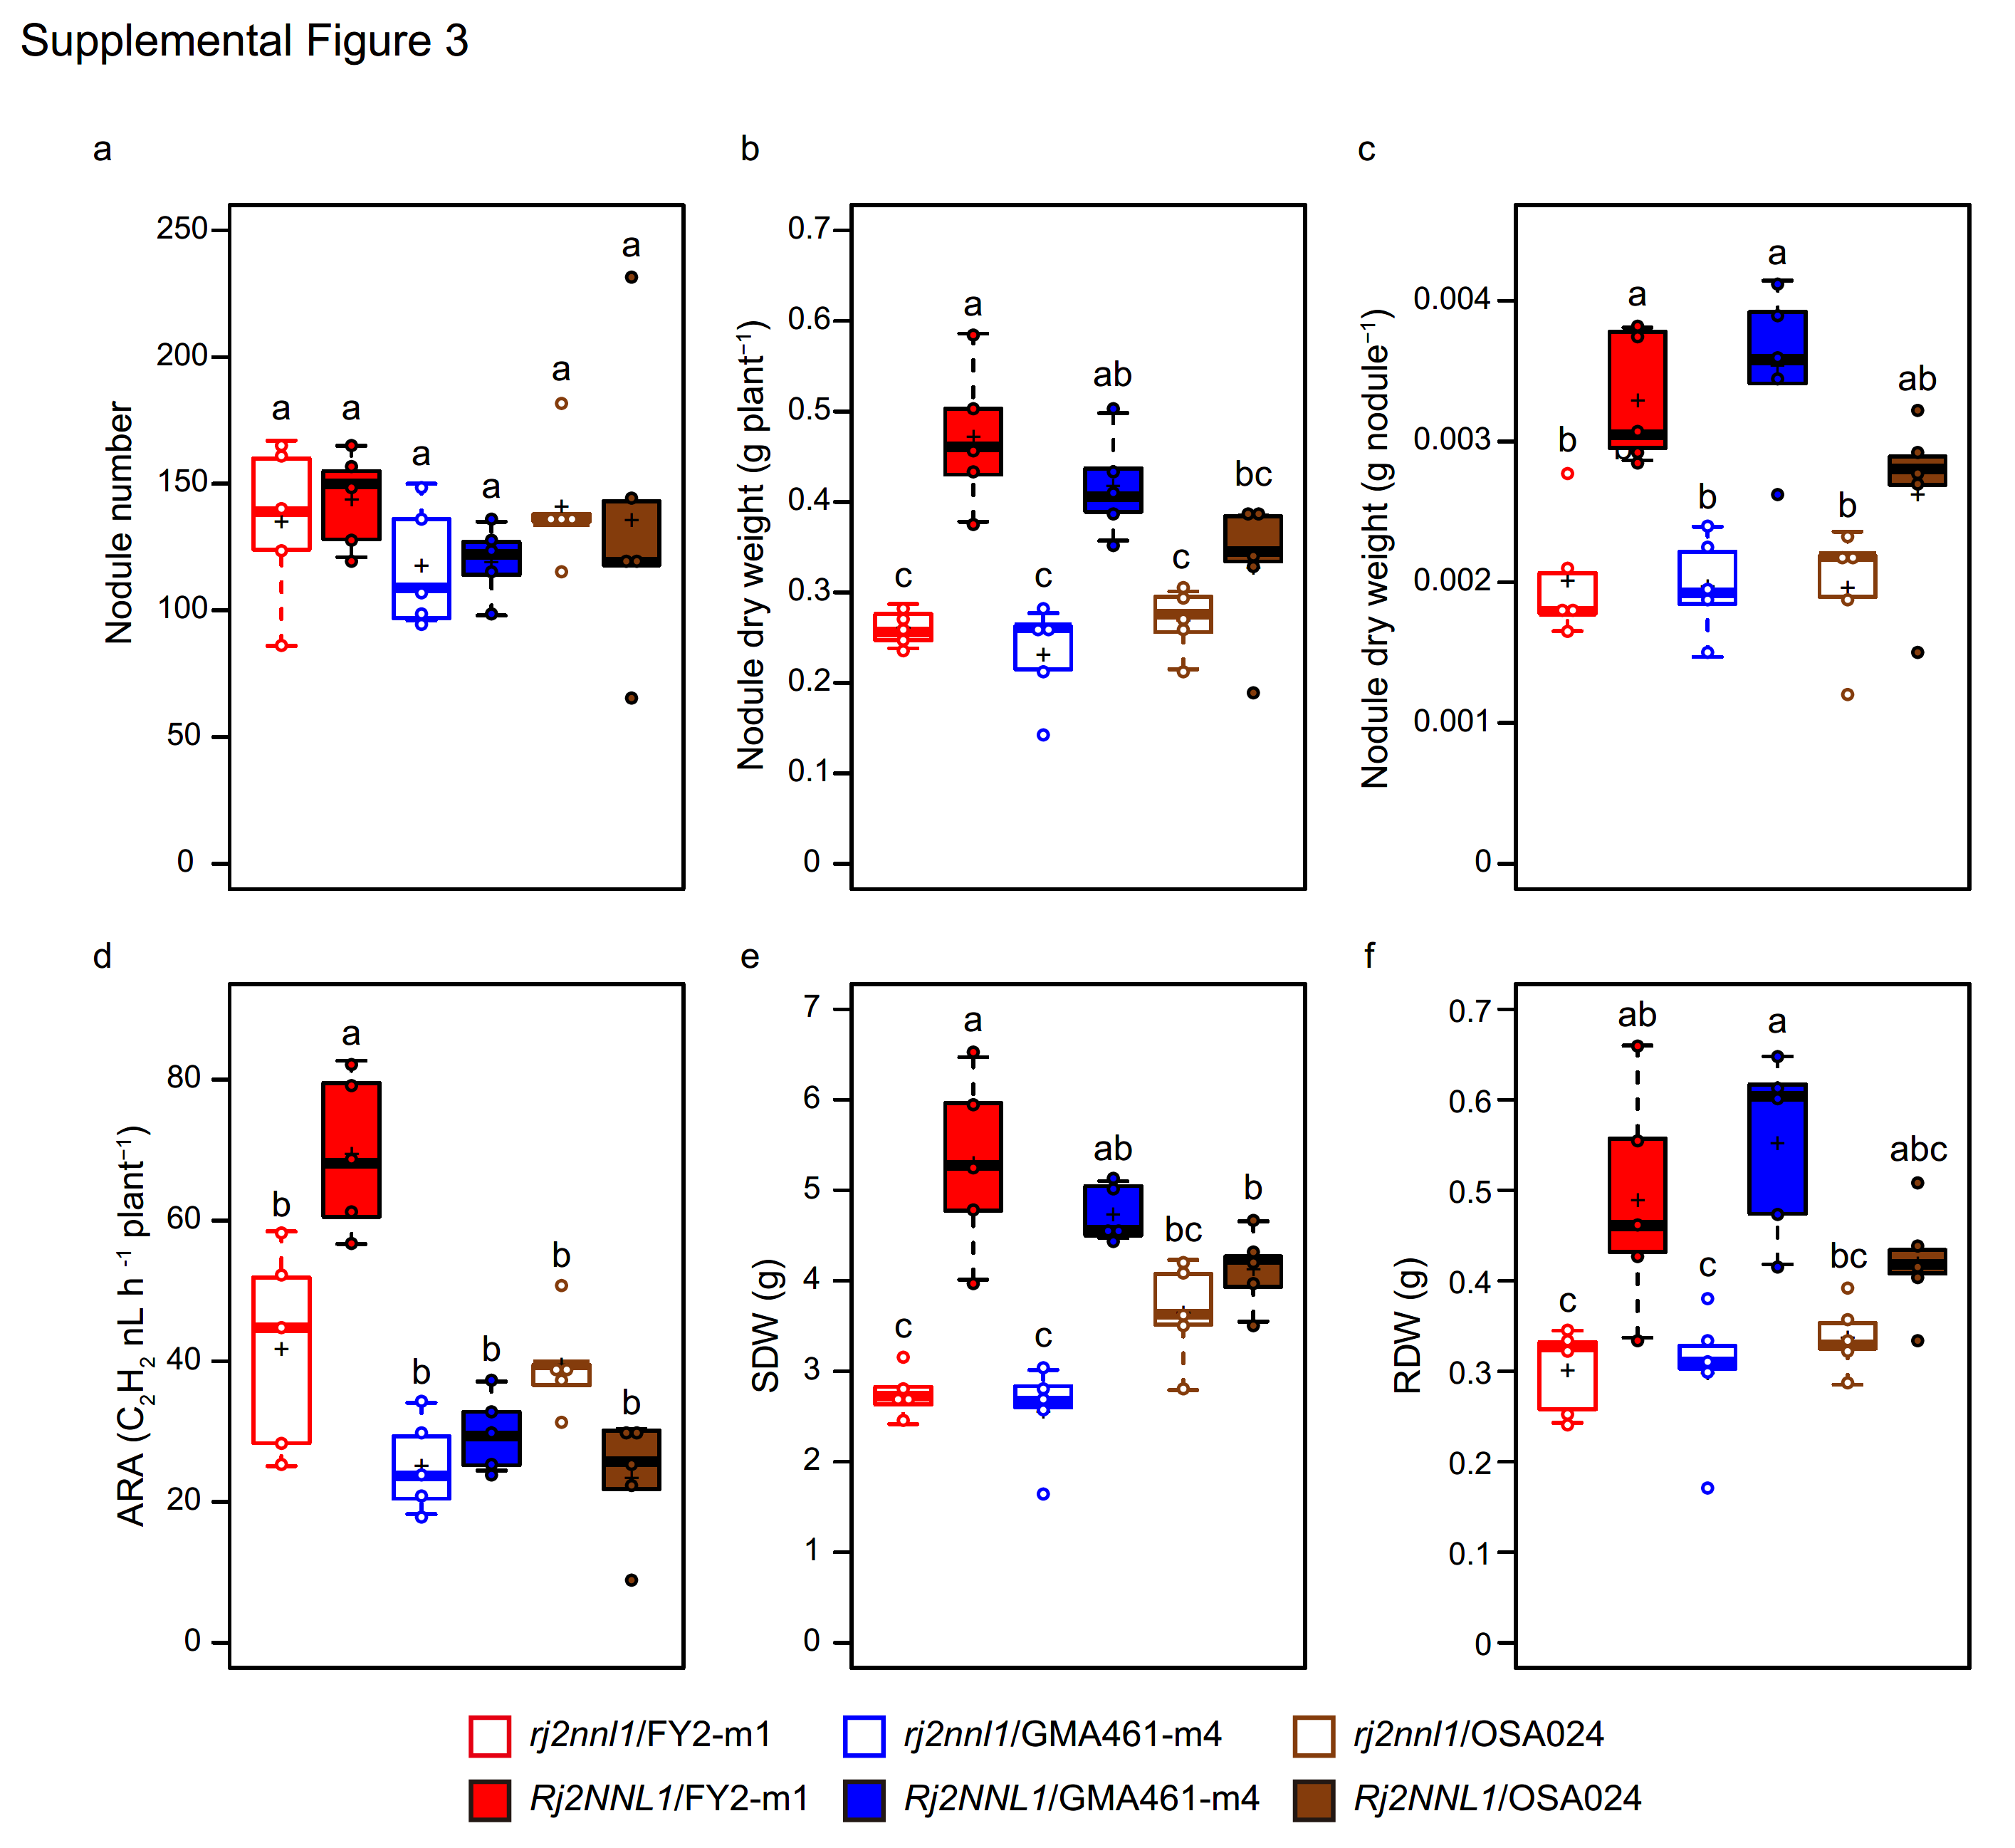


**Supplemental Figure 3**. Nodulation phenotypes from simultaneous inoculation of Nos++ incompatibility-avoiding bradyrhizobia strains with USDA6, USDA110, and USDA122.

a. Nodule number per plant (Nod No). b. Nodule dry weight per plant (Nod DW). c. Nod DW per nodule (NodDW/Nod). d. N2 fixation activity per plant (ARA/plant). e. Shoot dry weight (SDW). f. Root dry weight (RDW). *n*=4.


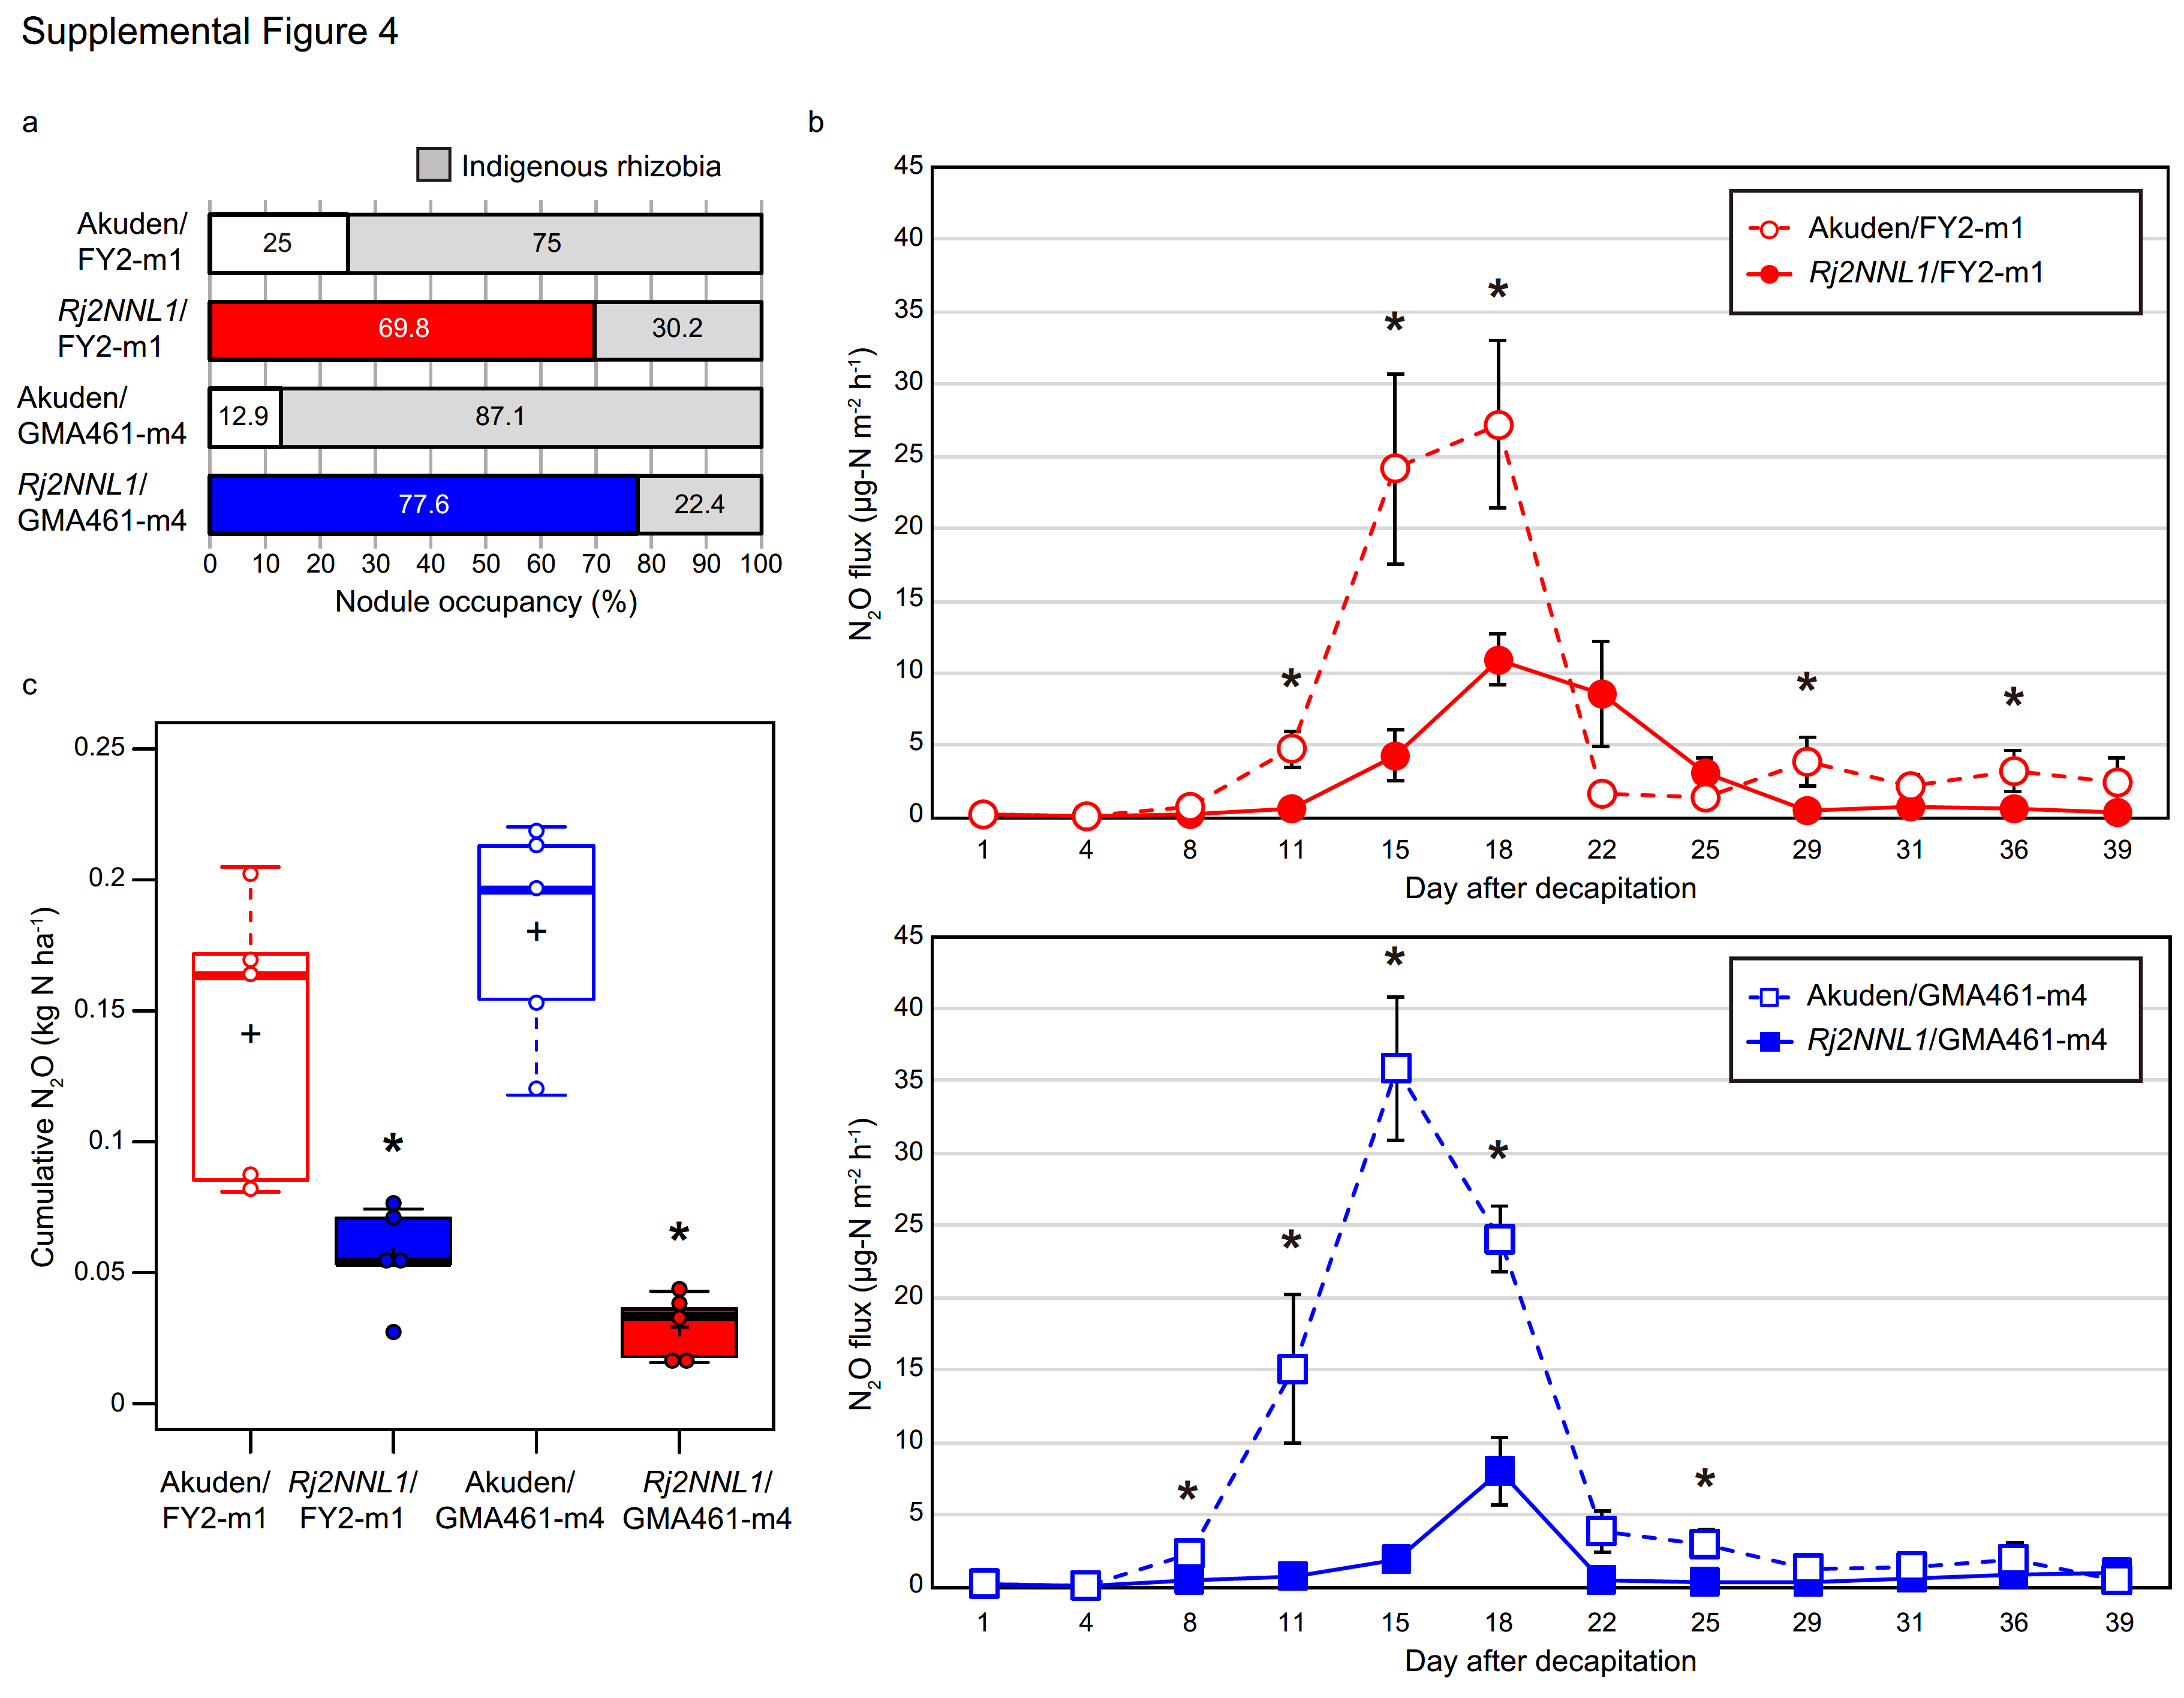


**Supplemental Figure 4**. Mitigation of N2O emissions through predominant infection by incompatibility-avoiding Nos++ bradyrhizobia strains in *Rj2/GmNNL1* soybean under competition with indigenous soil rhizobia.

a. Nodule occupancy. b. Trends in N2O emission over time following plant decapitation. c. Cumulative N2O emission. *n*=5.
